# Supplementary material for: Тексты массовой коммуникации: социокультурный аспект (на материале рекламных текстов)
Source: Royal Society of Chemistry journal article supplement (doi:10.1039/d2lc00563h), 2014-01-01
Supplement: d2lc00563h1.pdf [file d2lc00563h1.pdf]

## **Antibody-functionalized aluminum oxide-coated particles targeting neutrophil receptors in a multifrequency microfluidic impedance cytometer**

Brandon K Ashley

Department of Biomedical Engineering, Rutgers, the State University of New Jersey,  
Piscataway, NJ, 08854

Jianye Sui

Department of Electrical Engineering, the State University of New Jersey, Piscataway, NJ,  
08854

Mehdi Javanmard

Department of Electrical Engineering & Department of Biomedical Engineering Rutgers, the  
State University of New Jersey, Piscataway, NJ, 08854

Umer Hassan\*

Department of Electrical Engineering, Department of Biomedical Engineering, and Global  
Health Institute Rutgers, the State University of New Jersey, Piscataway, NJ, 08854

\*Corresponding Author. Email: [umer.hassan@rutgers.edu](mailto:umer.hassan@rutgers.edu)

**Electronic Supplemental Information (ESI)**

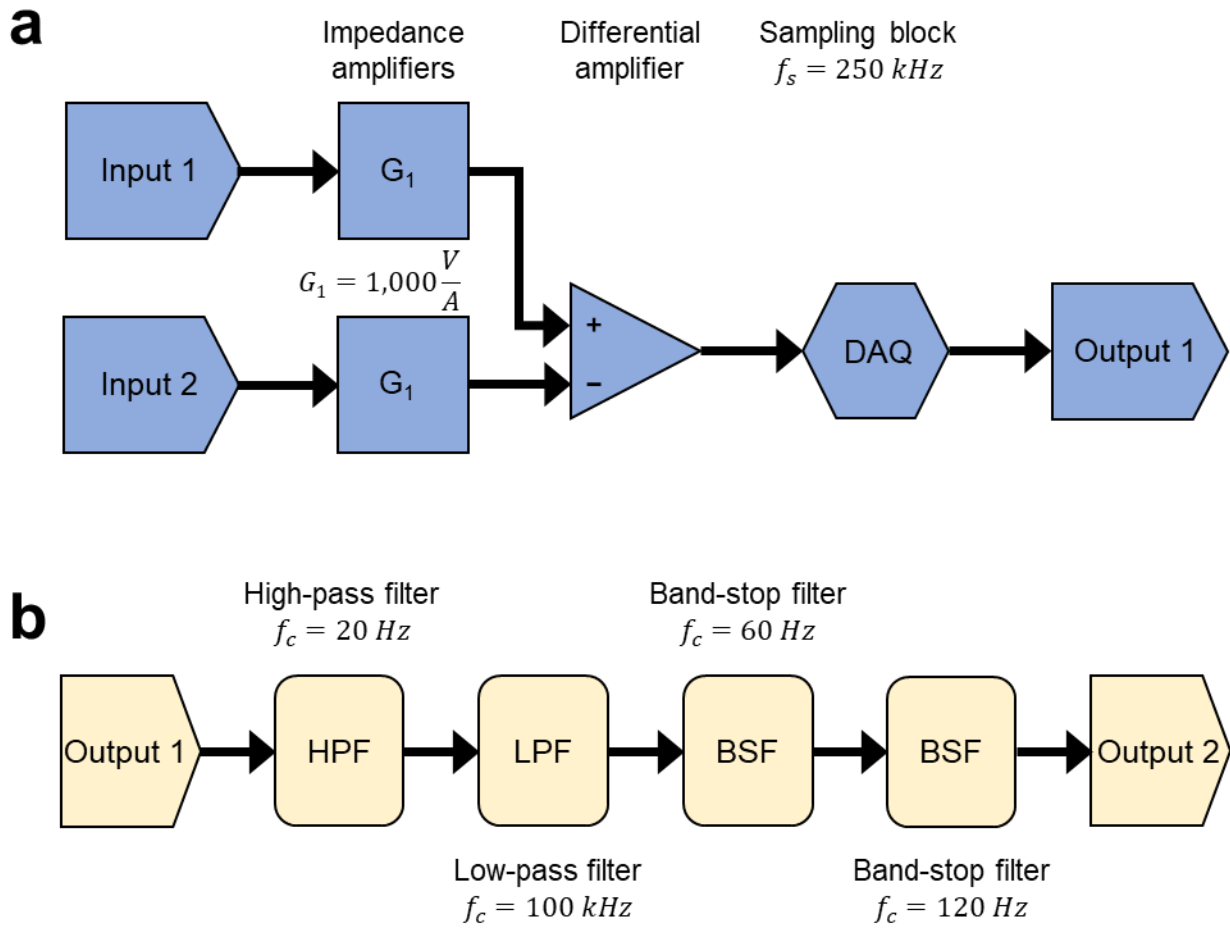

ESI Fig. 1: Flow chart of A) signal acquisition and B) digital signal processing to obtain electrical signatures from multifrequency microfluidic impedance cytometer.

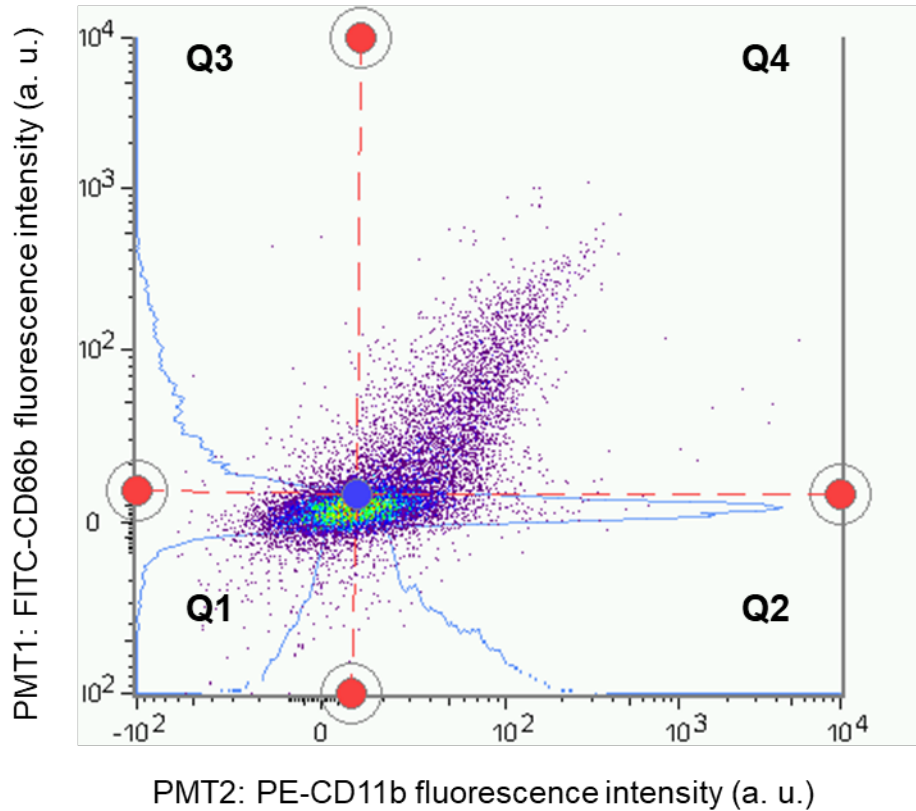

ESI Fig. 2: Two-stain and gated flow cytometry results for CD11b expression (stained with phycoerythrin or PE) and CD66b expression (stained with fluorescein isothiocyanate or FITC) as reference receptor expression to compare with multifrequency impedance cytometry results.

ESI Table 1: Percentage of neutrophils with significant receptor expression of CD11b, CD66b, or both measured from flow cytometry

| No expression (Q1) | CD11b+ only (Q2) | CD66b+ only (Q3) | CD11b+ & CD66b+ (Q4) |
|--------------------|------------------|------------------|----------------------|
| 35.3%              | 27.7%            | 4.3%             | 32.7%                |

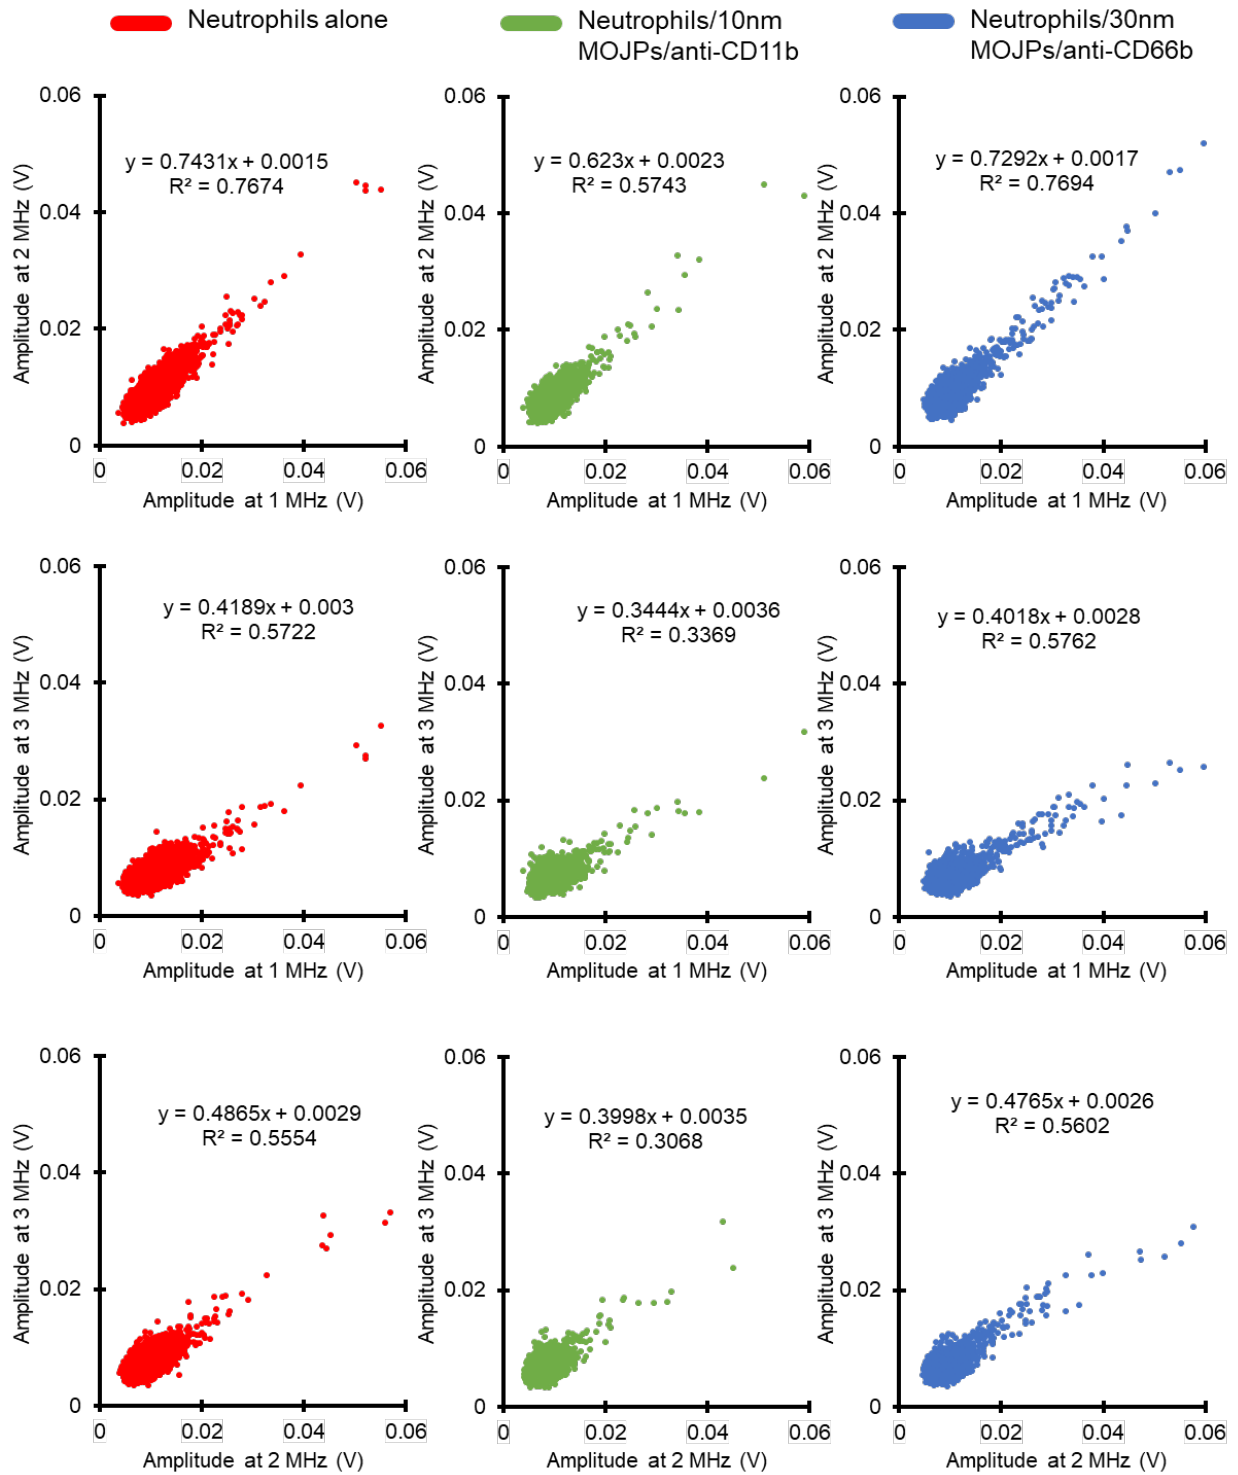

ESI Fig. 3: Additional scatter plot comparisons between different frequencies for bipolar pulse data collected. (red: isolated neutrophils alone, green: neutrophils combined with 10 nm aluminum oxide coated Janus microparticles (MOJPs) functionalized with anti-CD11b antibodies, blue: neutrophils combined with 30 nm MOJPs functionalized with anti-CD66b antibodies).

ESI Table 2: Cells alone vs. Cells/10nmMOJP/anti-CD11b all Machine Learning Results

| Machine Learning Model              | Accuracy | ROC AUC | Sensitivity | Selectivity |
|-------------------------------------|----------|---------|-------------|-------------|
| Fine Tree                           | 73.30%   | 82.00%  | 67.7%       | 79.0%       |
| Medium Tree                         | 73.6%    | 82.0%   | 68.8%       | 78.5%       |
| Coarse Tree                         | 72.1%    | 78.0%   | 70.1%       | 74.0%       |
| Gaussian Naïve Bayes                | 68.1%    | 80.0%   | 45.1%       | 91.1%       |
| Kernel Naïve Bayes                  | 73.5%    | 82.0%   | 65.5%       | 81.5%       |
| Linear Support Vector Machine (SVM) | 73.4%    | 80.0%   | 61.7%       | 88.4%       |
| Quadratic SVM                       | 73.7%    | 82.0%   | 62.8%       | 84.7%       |
| Cubic SVM                           | 63.1%    | 72.0%   | 84.1%       | 42.1%       |
| Fine Gaussian SVM                   | 74.8%    | 82.0%   | 73.7%       | 75.9%       |
| Medium Gaussian SVM                 | 75.4%    | 83.0%   | 67.5%       | 83.3%       |
| Coarse Gaussian SVM                 | 73.2%    | 80.0%   | 61.6%       | 84.9%       |
| Fine K-Nearest Neighbors (KNN)      | 68.0%    | 68.0%   | 66.9%       | 69.0%       |
| Medium KNN                          | 73.7%    | 82.0%   | 71.0%       | 76.3%       |

|                           |       |       |       |       |
|---------------------------|-------|-------|-------|-------|
| Coarse KNN                | 74.0% | 83.0% | 64.5% | 83.5% |
| Cosine KNN                | 73.9% | 81.0% | 73.4% | 74.4% |
| Cubic KNN                 | 73.4% | 81.0% | 70.3% | 76.5% |
| Weighted KNN              | 73.7% | 81.0% | 68.4% | 78.9% |
| Boosted Trees             | 75.1% | 84.0% | 72.1% | 79.0% |
| Bagged Trees              | 74.9% | 80.0% | 75.7% | 74.2% |
| Subspace KNN              | 70.2% | 77.0% | 69.2% | 71.1% |
| Narrow Neural Network     | 75.8% | 85.0% | 74.0% | 78.4% |
| Medium Neural Network     | 74.6% | 84.0% | 72.3% | 76.9% |
| Wide Neural Network       | 71.3% | 80.0% | 71.1% | 71.4% |
| Bilayered Neural Network  | 75.2% | 84.0% | 73.6% | 76.8% |
| Trilayered Neural Network | 74.6% | 84.0% | 71.4% | 77.8% |

ESI Table 3: Cells alone vs. Cells/30nmMOJP/anti-CD66b all Machine Learning Results

| Machine Learning Model | Accuracy | ROC AUC | Sensitivity | Selectivity |
|------------------------|----------|---------|-------------|-------------|
| Fine Tree              | 72.1%    | 78.0%   | 76.4%       | 82.5%       |
| Medium Tree            | 68.1%    | 80.0%   | 69.6%       | 85.5%       |
| Coarse Tree            | 73.5%    | 82.0%   | 73.0%       | 75.9%       |
| Gaussian Naïve Bayes   | 73.4%    | 80.0%   | 65.7%       | 86.8%       |
| Kernel Naïve Bayes     | 73.7%    | 82.0%   | 69.0%       | 83.5%       |
| Linear SVM             | 63.1%    | 72.0%   | 69.1%       | 85.3%       |
| Quadratic SVM          | 74.8%    | 82.0%   | 80.0%       | 85.7%       |
| Cubic SVM              | 75.4%    | 83.0%   | 86.9%       | 69.4%       |
| Fine Gaussian SVM      | 73.2%    | 80.0%   | 80.9%       | 79.1%       |
| Medium Gaussian SVM    | 82.3%    | 91.0%   | 78.5%       | 86.1%       |
| Coarse Gaussian SVM    | 78.6%    | 85.0%   | 68.5%       | 88.6%       |
| Fine KNN               | 75.6%    | 76.0%   | 76.4%       | 75.0%       |
| Medium KNN             | 80.0%    | 89.0%   | 81.6%       | 78.4%       |
| Coarse KNN             | 80.8%    | 90.0%   | 91.7%       | 84.1%       |

|                           |       |       |       |       |
|---------------------------|-------|-------|-------|-------|
| Cosine KNN                | 80.0% | 88.0% | 78.3% | 81.8% |
| Cubic KNN                 | 80.4% | 89.0% | 81.8% | 79.0% |
| Weighted KNN              | 80.0% | 89.0% | 79.5% | 80.5% |
| Boosted Trees             | 81.5% | 90.0% | 78.4% | 84.5% |
| Bagged Trees              | 81.3% | 90.0% | 80.6% | 82.0% |
| Subspace KNN              | 80.1% | 89.0% | 79.1% | 81.1% |
| Narrow Neural Network     | 82.8% | 92.0% | 81.6% | 84.0% |
| Medium Neural Network     | 82.3% | 91.0% | 81.8% | 82.8% |
| Wide Neural Network       | 78.3% | 88.0% | 78.4% | 78.1% |
| Bilayered Neural Network  | 82.7% | 91.0% | 82.5% | 83.1% |
| Trilayered Neural Network | 82.0% | 91.0% | 81.9% | 82.1% |



ESI Table 4: Cells/10nmMOJP/anti-CD11b vs. Cells/30nmMOJP/anti-CD66b all Machine Learning Results

| Machine Learning Model | Accuracy | ROC AUC | Sensitivity | Selectivity |
|------------------------|----------|---------|-------------|-------------|
| Fine Tree              | 75.7%    | 81.0%   | 80.5%       | 70.9%       |
| Medium Tree            | 76.0%    | 82.0%   | 83.5%       | 68.4%       |
| Coarse Tree            | 73.2%    | 76.0%   | 91.0%       | 55.4%       |
| Gaussian Naïve Bayes   | 61.4%    | 76.0%   | 90.8%       | 31.9%       |
| Kernel Naïve Bayes     | 72.9%    | 80.0%   | 76.6%       | 69.2%       |
| Linear SVM             | 64.9%    | 70.0%   | 68.5%       | 61.2%       |
| Quadratic SVM          | 79.5%    | 87.0%   | 89.3%       | 69.2%       |
| Cubic SVM              | 77.9%    | 84.0%   | 83.9%       | 72.0%       |
| Fine Gaussian SVM      | 75.9%    | 82.0%   | 75.2%       | 76.5%       |
| Medium Gaussian SVM    | 78.8%    | 87.0%   | 88.0%       | 69.6%       |
| Coarse Gaussian SVM    | 69.9%    | 77.0%   | 74.4%       | 65.4%       |
| Fine KNN               | 69.5%    | 69.0%   | 71.7%       | 67.2%       |
| Medium KNN             | 75.1%    | 83.0%   | 86.2%       | 64.0%       |

|                           |       |       |       |       |
|---------------------------|-------|-------|-------|-------|
| Coarse KNN                | 76.1% | 85.0% | 89.2% | 63.0% |
| Cosine KNN                | 75.6% | 83.0% | 81.7% | 69.5% |
| Cubic KNN                 | 74.8% | 82.0% | 85.8% | 63.7% |
| Weighted KNN              | 75.8% | 83.0% | 83.6% | 67.6% |
| Boosted Trees             | 77.5% | 85.0% | 84.9% | 70.1% |
| Bagged Trees              | 78.0% | 85.0% | 83.3% | 72.7% |
| Subspace KNN              | 75.3% | 82.0% | 81.1% | 69.5% |
| Narrow Neural Network     | 79.5% | 87.0% | 84.8% | 74.2% |
| Medium Neural Network     | 78.4% | 86.0% | 83.3% | 73.4% |
| Wide Neural Network       | 73.3% | 81.0% | 74.4% | 72.2% |
| Bilayered Neural Network  | 78.4% | 86.0% | 83.2% | 73.7% |
| Trilayered Neural Network | 78.1% | 86.0% | 82.9% | 73.3% |
